# Supplementary material for: Human breast cancer cells educate macrophages toward the M2 activation status
Source: PubMed Central journal article supplement (PMC4531540; doi:10.1186/s13058-015-0621-0), 2015-08-05

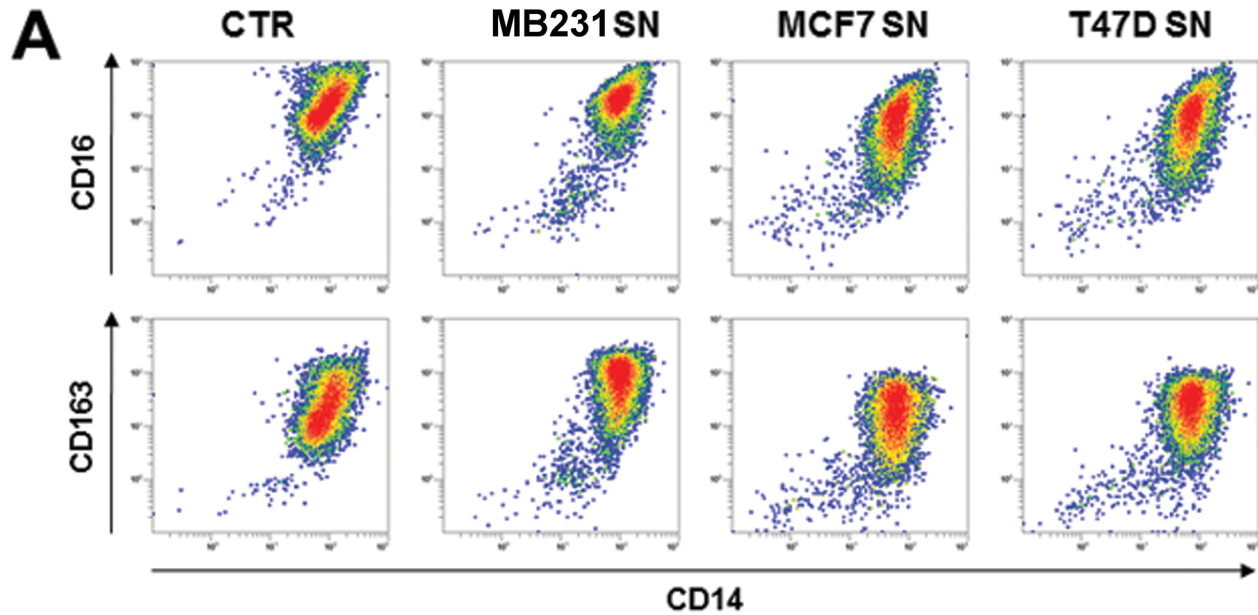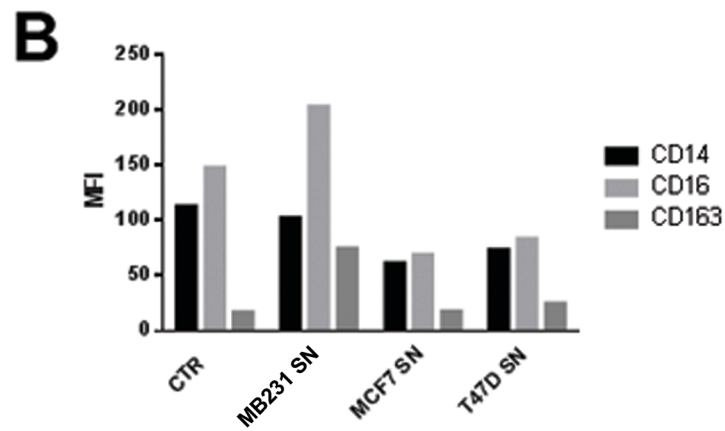

Supplement: 13058_2015_621_MOESM5_ESM.pdf [file 13058_2015_621_MOESM5_ESM.pdf]
