# Supplementary material for: Human breast cancer cells educate macrophages toward the M2 activation status
Source: Breast Cancer Res. 2015 Aug 5;17(1):101. doi: 10.1186/s13058-015-0621-0 (PMC4531540; doi:10.1186/s13058-015-0621-0)
Supplement: Additional file 1: — Immunohistochemical analysis conditions. (PDF 273 kb) [file 13058_2015_621_MOESM1_ESM.pdf]

### Additional file 1. Immunohistochemistry conditions

| Primary antibody                          | Antigen retrieval conditions                                                             | Signal Amplification system          | Development                                                                |
|-------------------------------------------|------------------------------------------------------------------------------------------|--------------------------------------|----------------------------------------------------------------------------|
| CD68 (anti-SA2 antibody clone 3C6, Abcam) | Automated immunostaining device BenchMark XT (Roche Diagnostics/Ventana Medical Systems) |                                      | OptiView DAB IHC Detection Kit (Roche Diagnostics/Ventana Medical Systems) |
| CD163 (clone 10D6, Novocastra)            | Heat induced epitope retrieval with Tris-EDTA buffer, pH 9                               | VECTASTAIN® ABC system (Vector labs) | DAB substrate (Dako)                                                       |
| HLA-DRα (Dako)                            | Heat induced epitope retrieval with Tris-EDTA buffer, pH 9                               | VECTASTAIN® ABC system (Vector labs) | DAB substrate (Dako)                                                       |
