# Supplementary material for: Human breast cancer cells educate macrophages toward the M2 activation status
Source: Springer Nature journal article supplement (doi:10.1186/s13058-015-0621-0), 2015-08-04

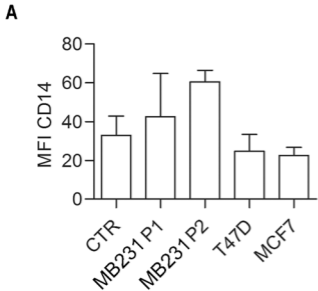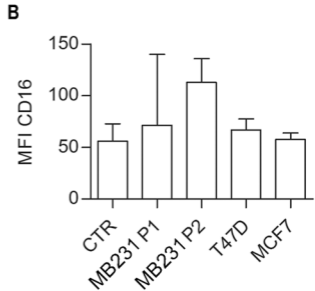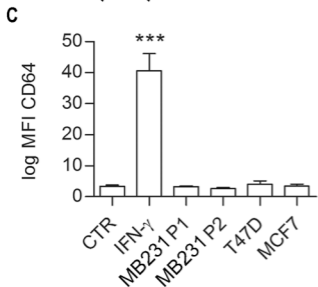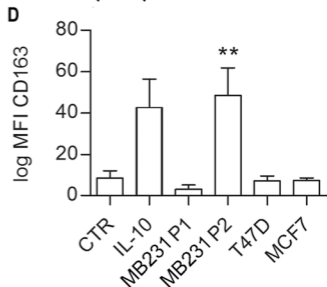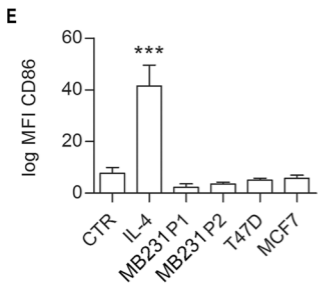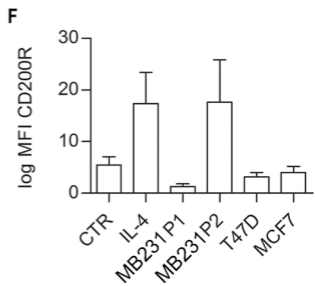

Supplement: MOESM3 [file 9781532]
